# Supplementary material for: Nationwide Distribution of Dengue Virus Type 3 (DENV-3) Genotype I and Emergence of DENV-3 Genotype III during the 2019 Outbreak in Bangladesh
Source: MDPI journal article supplement (doi:10.3390/tropicalmed6020058), 2021-04-21
Supplement: s1 [file s1]

|                  |                                                             |    |
|------------------|-------------------------------------------------------------|----|
| DEN-Faridpur02   | VSTGSQLAKRFSKGLLNGQGPMLVMAFIAFLRFLAIPPTAGVLARWGTFKKSGAIKVLK | 60 |
| DEN-Khulna02     | VSTGSQLAKRFSKGLLNGQGPMLVMAFIAFLRFLAIPPTAGVLARWGTFKKSGAIKVLK | 60 |
| DEN-Mymensingh03 | VSTGSQLAKRFSRGLLNGQGPMLVMAFIAFLRFLAIPPTAGILARWGTFKKSGAIKVLR | 60 |
| DEN-Kustai01     | VSTGSQLAKRFSRGLLNGQGPMLVMAFIAFLRFLAIPPTAGILVRWGTFKKSGAIKVLR | 60 |
| DEN-Dhaka14      | VSTGSQLAKRFSRGLLNGQGPMLVMAFIAFLRFLAIPPTAGILARWGTFKKSGAIKVLR | 60 |
| DEN-Barisal06    | -----QLAKRFSRGLLNGQGPMLVMAFIAFLRFLAIPPTAGILARWGTFKKSGAIKVLR | 55 |
| DEN-Barisal01    | VSTGSQLAKRFSRGLLNGQGPMLVMAFIAFLRFLAIPPTAGILARWGTFKKSGAIKVLR | 60 |
| DEN-Barisal02    | VSTGSQLAKRFSRGLLNGQGPMLVMAFIAFLRFLAIPPTAGILARWGTFKKSGAIKVLR | 60 |
| DEN-Barisal03    | VSTGSQLAKRFSRGLLNGQGPMLVMAFIAFLRFLAIPPTAGILARWGTFKKSGAIKVLR | 60 |
| DEN-Barisal04    | VSTGSQLAKRFSRGLLNGQGPMLVMAFIAFLRFLAIPPTAGILARWGTFKKSGAIKVLR | 60 |
| DEN-Barisal05    | VSTGSQLAKRFSRGLLNGQGPMLVMAFIAFLRFLAIPPTAGILARWGTFKKSGAIKVLR | 60 |
| DEN-Barisal07    | VSTGSQLAKRFSRGLLNGQGPMLVMAFIAFLRFLAIPPTAGILARWGTFKKSGAIKVLR | 60 |
| DEN-Chittagong01 | VSTGSQLAKRFSRGLLNGQGPMLVMAFIAFLRFLAIPPTAGILARWGTFKKSGAIKVLR | 60 |
| DEN-Chittagong04 | VSTGSQLAKRFSRGLLNGQGPMLVMAFIAFLRFLAIPPTAGILARWGTFKKSGAIKVLR | 60 |
| DEN-Chittagong05 | VSTGSQLAKRFSRGLLNGQGPMLVMAFIAFLRFLAIPPTAGILARWGTFKKSGAIKVLR | 60 |
| DEN-Dhaka01      | VSTGSQLAKRFSRGLLNGQGPMLVMAFIAFLRFLAIPPTAGILARWGTFKKSGAIKVLR | 60 |
| DEN-Dhaka02      | VSTGSQLAKRFSRGLLNGQGPMLVMAFIAFLRFLAIPPTAGILARWGTFKKSGAIKVLR | 60 |
| DEN-Dhaka03      | VSTGSQLAKRFSRGLLNGQGPMLVMAFIAFLRFLAIPPTAGILARWGTFKKSGAIKVLR | 60 |
| DEN-Dhaka05      | VSTGSQLAKRFSRGLLNGQGPMLVMAFIAFLRFLAIPPTAGILARWGTFKKSGAIKVLR | 60 |
| DEN-Dhaka10      | VSTGSQLAKRFSRGLLNGQGPMLVMAFIAFLRFLAIPPTAGILARWGTFKKSGAIKVLR | 60 |
| DEN-Dhaka12      | VSTGSQLAKRFSRGLLNGQGPMLVMAFIAFLRFLAIPPTAGILARWGTFKKSGAIKVLR | 60 |
| DEN-Dhaka16      | VSTGSQLAKRFSRGLLNGQGPMLVMAFIAFLRFLAIPPTAGILARWGTFKKSGAIKVLR | 60 |
| DEN-Dhaka17      | VSTGSQLAKRFSRGLLNGQGPMLVMAFIAFLRFLAIPPTAGILARWGTFKKSGAIKVLR | 60 |
| DEN-Dhaka18      | VSTGSQLAKRFSRGLLNGQGPMLVMAFIAFLRFLAIPPTAGILARWGTFKKSGAIKVLR | 60 |
| DEN-Jessore02    | VSTGSQLAKRFSRGLLNGQGPMLVMAFIAFLRFLAIPPTAGILARWGTFKKSGAIKVLR | 60 |
| DEN-Khulna03     | VSTGSQLAKRFSRGLLNGQGPMLVMAFIAFLRFLAIPPTAGILARWGTFKKSGAIKVLR | 60 |
| DEN-Khulna04     | VSTGSQLAKRFSRGLLNGQGPMLVMAFIAFLRFLAIPPTAGILARWGTFKKSGAIKVLR | 60 |
| DEN-Khulna05     | VSTGSQLAKRFSRGLLNGQGPMLVMAFIAFLRFLAIPPTAGILARWGTFKKSGAIKVLR | 60 |
| DEN-Kustai02     | VSTGSQLAKRFSRGLLNGQGPMLVMAFIAFLRFLAIPPTAGILARWGTFKKSGAIKVLR | 60 |
| DEN-Mymensingh01 | VSTGSQLAKRFSRGLLNGQGPMLVMAFIAFLRFLAIPPTAGILARWGTFKKSGAIKVLR | 60 |
| DEN-Mymensingh02 | VSTGSQLAKRFSRGLLNGQGPMLVMAFIAFLRFLAIPPTAGILARWGTFKKSGAIKVLR | 60 |
| DEN-Rangpur01    | VSTGSQLAKRFSRGLLNGQGPMLVMAFIAFLRFLAIPPTAGILARWGTFKKSGAIKVLR | 60 |
| DEN-Rangpur02    | VSTGSQLAKRFSRGLLNGQGPMLVMAFIAFLRFLAIPPTAGILARWGTFKKSGAIKVLR | 60 |
| DEN-Rangpur03    | VSTGSQLAKRFSRGLLNGQGPMLVMAFIAFLRFLAIPPTAGILARWGTFKKSGAIKVLR | 60 |
| DEN-Sylhet01     | VSTGSQLAKRFSRGLLNGQGPMLVMAFIAFLRFLAIPPTAGILARWGTFKKSGAIKVLR | 60 |
| DEN-Sylhet02     | VSTGSQLAKRFSRGLLNGQGPMLVMAFIAFLRFLAIPPTAGILARWGTFKKSGAIKVLR | 60 |
| DEN-Dhaka06      | -STGSQLGKRLSRGLLNGQGPMLVMAFIAFLRFLAIPPTAGILVRWGTFKKSGAIKVLR | 59 |
| DEN-Dhaka08      | VSTGSQLGKRLSRGLLNGQGPMLVMAFIAFLRFLAIPPTAGILARWGTFKKSGAIKVLR | 60 |

\*\*. \*\*.\*:\*\*\*\*\*:\*.\*\*\*\*\*:

|                           |                                                             |     |
|---------------------------|-------------------------------------------------------------|-----|
| DEN-Faridpur02            | GFKKEISNMLSINRRKKTSLCLMMILPAALAFHLTSRDGEPRMIVGKNERGKSLLFKTA | 120 |
| DEN-Khulna02              | GFKKEISNMLSINRRKKTSLCLMMILPAALAFHLTSRDGEPRMIVGKNERGKSLLFKTA | 120 |
| DEN-Mymensingh03          | GFKREISNMLSINRRKKTSLCLMMMLPATLAFHLTSRDGEPRMIVGKNERGKSLLFKTA | 120 |
| DEN-Kustai01              | GFKREISNMLSINRRKKTSLCLMMMLPATLAFHLTSRDGEPRMIVGKNERGKSLLFKTA | 120 |
| DEN-Dhaka14               | GFKGEISNMLSINRRKKTSLCLMMMLPATLAFHLTSRDGEPRMIVGKNERGKSLLFKTA | 120 |
| DEN-Barisal06             | GFKREISNMLSINRRKKTSLCLMMMLPATLAFHLTSRDGEPRMIVGKNERGKSLLFKTA | 115 |
| DEN-Barisal01             | GFKREISNMLSINRRKKTSLCLMMMLPATLAFHLTSRDGEPRMIVGKNERGKSLLFKTA | 120 |
| DEN-Barisal02             | GFKREISNMLSINRRKKTSLCLMMMLPATLAFHLTSRDGEPRMIVGKNERGKSLLFKTA | 120 |
| DEN-Barisal03             | GFKREISNMLSINRRKKTSLCLMMMLPATLAFHLTSRDGEPRMIVGKNERGKSLLFKTA | 120 |
| DEN-Barisal04             | GFKREISNMLSINRRKKTSLCLMMMLPATLAFHLTSRDGEPRMIVGKNERGKSLLFKTA | 120 |
| DEN-Barisal05             | GFKREISNMLSINRRKKTSLCLMMMLPATLAFHLTSRDGEPRMIVGKNERGKSLLFKTA | 120 |
| DEN-Barisal07             | GFKREISNMLSINRRKKTSLCLMMMLPATLAFHLTSRDGEPRMIVGKNERGKSLLFKTA | 120 |
| DEN-Chittagong01          | GFKREISNMLSINRRKKTSLCLMMMLPATLAFHLTSRDGEPRMIVGKNERGKSLLFKTA | 120 |
| DEN-Chittagong04          | GFKREISNMLSINRRKKTSLCLMMMLPATLAFHLTSRDGEPRMIVGKNERGKSLLFKTA | 120 |
| DEN-Chittagong05          | GFKREISNMLSINRRKKTSLCLMMMLPATLAFHLTSRDGEPRMIVGKNERGKSLLFKTA | 120 |
| DEN-Dhaka01               | GFKREISNMLSINRRKKTSLCLMMMLPATLAFHLTSRDGEPRMIVGKNERGKSLLFKTA | 120 |
| DEN-Dhaka02               | GFKREISNMLSINRRKKTSLCLMMMLPATLAFHLTSRDGEPRMIVGKNERGKSLLFKTA | 120 |
| DEN-Dhaka03               | GFKREISNMLSINRRKKTSLCLMMMLPATLAFHLTSRDGEPRMIVGKNERGKSLLFKTA | 120 |
| DEN-Dhaka05               | GFKREISNMLSINRRKKTSLCLMMMLPATLAFHLTSRDGEPRMIVGKNERGKSLLFKTA | 120 |
| DEN-Dhaka10               | GFKREISNMLSINRRKKTSLCLMMMLPATLAFHLTSRDGEPRMIVGKNERGKSLLFKTA | 120 |
| DEN-Dhaka12               | GFKREISNMLSINRRKKTSLCLMMMLPATLAFHLTSRDGEPRMIVGKNERGKSLLFKTA | 120 |
| DEN-Dhaka16               | GFKREISNMLSINRRKKTSLCLMMMLPATLAFHLTSRDGEPRMIVGKNERGKSLLFKTA | 120 |
| DEN-Dhaka17               | GFKREISNMLSINRRKKTSLCLMMMLPATLAFHLTSRDGEPRMIVGKNERGKSLLFKTA | 120 |
| DEN-Dhaka18               | GFKREISNMLSINRRKKTSLCLMMMLPATLAFHLTSRDGEPRMIVGKNERGKSLLFKTA | 120 |
| DEN-Jessore02             | GFKREISNMLSINRRKKTSLCLMMMLPATLAFHLTSRDGEPRMIVGKNERGKSLLFKTA | 120 |
| DEN-Khulna03              | GFKREISNMLSINRRKKTSLCLMMMLPATLAFHLTSRDGEPRMIVGKNERGKSLLFKTA | 120 |
| DEN-Khulna04              | GFKREISNMLSINRRKKTSLCLMMMLPATLAFHLTSRDGEPRMIVGKNERGKSLLFKTA | 120 |
| DEN-Khulna05              | GFKREISNMLSINRRKKTSLCLMMMLPATLAFHLTSRDGEPRMIVGKNERGKSLLFKTA | 120 |
| DEN-Kustai02              | GFKREISNMLSINRRKKTSLCLMMMLPATLAFHLTSRDGEPRMIVGKNERGKSLLFKTA | 120 |
| DEN-Mymensingh01          | GFKREISNMLSINRRKKTSLCLMMMLPATLAFHLTSRDGEPRMIVGKNERGKSLLFKTA | 120 |
| DEN-Mymensingh02          | GFKREISNMLSINRRKKTSLCLMMMLPATLAFHLTSRDGEPRMIVGKNERGKSLLFKTA | 120 |
| DEN-Rangpur01             | GFKREISNMLSINRRKKTSLCLMMMLPATLAFHLTSRDGEPRMIVGKNERGKSLLFKTA | 120 |
| DEN-Rangpur02             | GFKREISNMLSINRRKKTSLCLMMMLPATLAFHLTSRDGEPRMIVGKNERGKSLLFKTA | 120 |
| DEN-Rangpur03             | GFKREISNMLSINRRKKTSLCLMMMLPATLAFHLTSRDGEPRMIVGKNERGKSLLFKTA | 120 |
| DEN-Sylhet01              | GFKREISNMLSINRRKKTSLCLMMMLPATLAFHLTSRDGEPRMIVGKNERGKSLLFKTA | 120 |
| DEN-Sylhet02              | GFKREISNMLSINRRKKTSLCLMMMLPATLAFHLTSRDGEPRMIVGKNERGKSLLFKTA | 120 |
| DEN-Dhaka06               | GFKREISNMLSINRRKKTSLCLMMMLPATLAFHLTSRDGEPRMIVGKNERGKSLLFKTA | 119 |
| DEN-Dhaka08               | GFKREISNMLSINRRKKTSLCLMMMLPATLAFHLTSRDGEPRMIVGKNERGKSLLFKTA | 120 |
| *** *****:*****:***:***** |                                                             |     |

|                  |                                |     |
|------------------|--------------------------------|-----|
| DEN-Faridpur02   | SGINMCTLIAMD LGEMCDDTVTYKCPHI- | 148 |
| DEN-Khulna02     | SGINMCTLIAMD LGEMCDDTVTYKCPHI- | 148 |
| DEN-Mymensingh03 | SGINMCTLIAMD LGEMCDDTVTYKCPVI- | 148 |
| DEN-Kustai01     | SGINMCTLIAMD LGEMCDDTVTYKCPLI- | 148 |
| DEN-Dhaka14      | SGINMCTLIAMD LGEMCDDTVTYKCPLI- | 148 |
| DEN-Barisal06    | SGINMCTLIAMD LGEMCDDTVTYKCPLIT | 144 |
| DEN-Barisal01    | SGINMCTLIAMD LGEMCDDTVTYKCPLI- | 148 |
| DEN-Barisal02    | SGINMCTLIAMD LGEMCDDTVTYKCPLIT | 149 |
| DEN-Barisal03    | SGINMCTLIAMD LGEMCDDTVTYKCPLIT | 149 |
| DEN-Barisal04    | SGINMCTLIAMD LGEMCDDTVTYKCPLIT | 149 |
| DEN-Barisal05    | SGINMCTLIAMD LGEMCDDTVTYKCPLIT | 149 |
| DEN-Barisal07    | SGINMCTLIAMD LGEMCDDTVTYKCPLIT | 149 |
| DEN-Chittagong01 | SGINMCTLIAMD LGEMCDDTVTYKCPLI- | 148 |
| DEN-Chittagong04 | SGINMCTLIAMD LGEMCDDTVTYKCPLI- | 148 |
| DEN-Chittagong05 | SGINMCTLIAMD LGEMCDDTVTYKCPLI- | 148 |
| DEN-Dhaka01      | SGINMCTLIAMD LGEMCDDTVTYKCPLIT | 149 |
| DEN-Dhaka02      | SGINMCTLIAMD LGEMCDDTVTYKCPLI- | 148 |
| DEN-Dhaka03      | SGINMCTLIAMD LGEMCDDTVTYKCPLI- | 148 |
| DEN-Dhaka05      | SGINMCTLIAMD LGEMCDDTVTYKCPLI- | 148 |
| DEN-Dhaka10      | SGINMCTLIAMD LGEMCDDTVTYKCPLI- | 148 |
| DEN-Dhaka12      | SGINMCTLIAMD LGEMCDDTVTYKCPLI- | 148 |
| DEN-Dhaka16      | SGINMCTLIAMD LGEMCDDTVTYKCPLI- | 148 |
| DEN-Dhaka17      | SGINMCTLIAMD LGEMCDDTVTYKCPLI- | 148 |
| DEN-Dhaka18      | SGINMCTLIAMD LGEMCDDTVTYKCPLI- | 148 |
| DEN-Jessore02    | SGINMCTLIAMD LGEMCDDTVTYKCPLI- | 148 |
| DEN-Khulna03     | SGINMCTLIAMD LGEMCDDTVTYKCPLI- | 148 |
| DEN-Khulna04     | SGINMCTLIAMD LGEMCDDTVTYKCPLI- | 148 |
| DEN-Khulna05     | SGINMCTLIAMD LGEMCDDTVTYKCPLI- | 148 |
| DEN-Kustai02     | SGINMCTLIAMD LGEMCDDTVTYKCPLI- | 148 |
| DEN-Mymensingh01 | SGINMCTLIAMD LGEMCDDTVTYKCPLI- | 148 |
| DEN-Mymensingh02 | SGINMCTLIAMD LGEMCDDTVTYKCPLI- | 148 |
| DEN-Rangpur01    | SGINMCTLIAMD LGEMCDDTVTYKCPLI- | 148 |
| DEN-Rangpur02    | SGINMCTLIAMD LGEMCDDTVTYKCPLI- | 148 |
| DEN-Rangpur03    | SGINMCTLIAMD LGEMCDDTVTYKCPLI- | 148 |
| DEN-Sylhet01     | SGINMCTLIAMD LGEMCDDTVTYKCPLI- | 148 |
| DEN-Sylhet02     | SGINMCTLIAMD LGEMCDDTVTYKCPLI- | 148 |
| DEN-Dhaka06      | SGINMCTLIAMD LGEMCDDTVTYKCPLI- | 147 |
| DEN-Dhaka08      | SGINMCTLIAMD LGEMCDDTVTYKCPLI- | 148 |
| ***** *          |                                |     |

**Fig. S2** Alignment of partial CprM amino acid sequences of DENV-3 performed by Clustal Omega. Asterisk at the bottom indicates consensus amino acid. Amino acids of genotype III (Faridpur02, Khulna02) on top that are distinct from those of genotype I (all other viruses) are shown in red.
