# Supplementary material for: Nationwide Distribution of Dengue Virus Type 3 (DENV-3) Genotype I and Emergence of DENV-3 Genotype III during the 2019 Outbreak in Bangladesh
Source: MDPI journal article supplement (doi:10.3390/tropicalmed6020058), 2021-04-21
Supplement: s1 [file s1]

## Supplementary Materials:

### Nationwide Distribution of Dengue Virus Type 3 (DENV-3) Genotype I and Emergence of DENV-3 Genotype III during the 2019 Outbreak in Bangladesh

Snigdha Rahman Titir <sup>1</sup>, Shyamal Kumar Paul <sup>2</sup>, Salma Ahmed <sup>1</sup>, Nazia Haque <sup>3</sup>, Syeda Anjuman Nasreen <sup>1</sup>, Khondoker Shoaib Hossain <sup>4</sup>, Fahim Uddin Ahmad <sup>5</sup>, Sultana Shabnam Nila <sup>1</sup>, Jobyda Khanam <sup>1</sup>, Neaz Nowsher <sup>6</sup>, Abu Mohammad Mayeenuddin Al Amin <sup>7</sup>, Amdad Ullah Khan <sup>8</sup>, Meiji Soe Aung <sup>9</sup> and Nobumichi Kobayashi <sup>9,\*</sup>

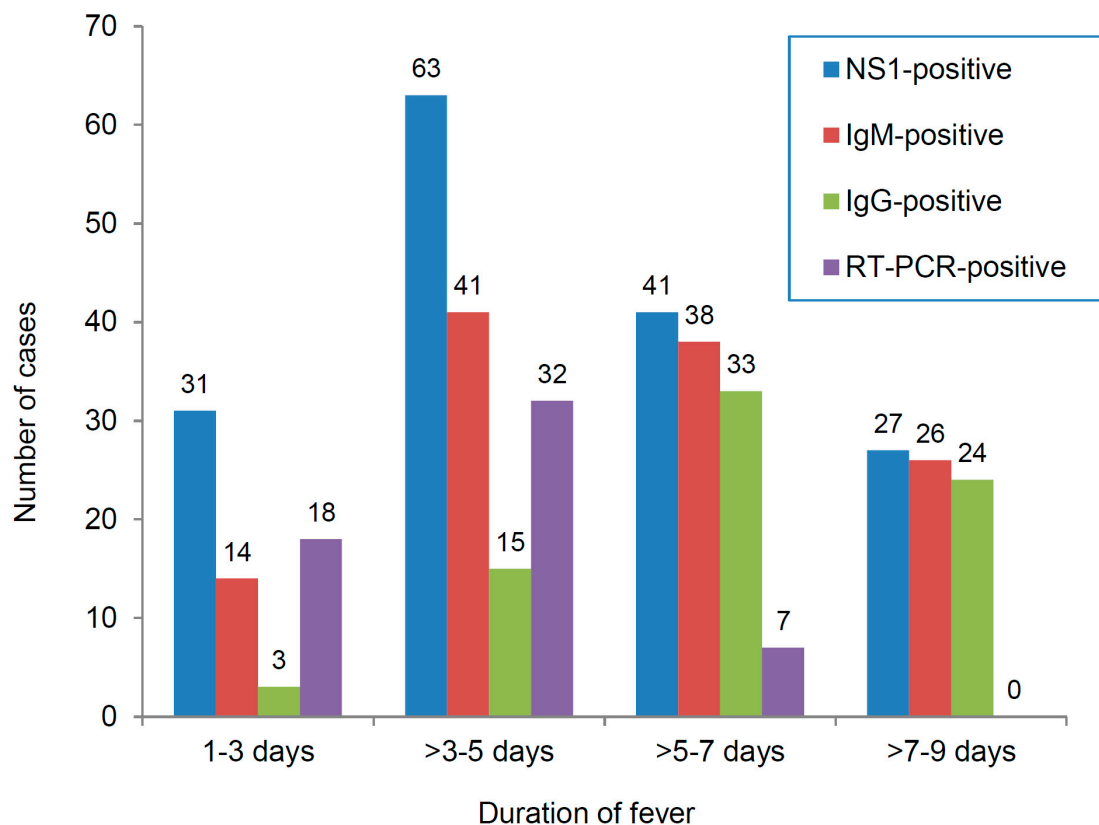

**Figure S1.** Incidence of dengue cases showing positive results of NS-1, IgM, IgG, and RT-PCR depending on duration of fever.
